# Supplementary material for: Dye adsorption performance of an anionic Cd2+ MOF material based on semi-rigid hexacarboxylic acid
Source: Royal Society of Chemistry journal article supplement (doi:10.1039/d4ce00362d), 2024-01-01
Supplement: d4ce00362d1.pdf [file d4ce00362d1.pdf]

# Dye adsorption performance of an anionic $\text{Cd}^{2+}$ MOF material based on semi-rigid hexacarboxylic acid

Yuxuan Xiong, Dandan Li, Jie-Hui Yu<sup>a,\*</sup> and Qingfeng Yang<sup>b,\*</sup>

a. College of Chemistry, and State Key Laboratory of Inorganic Synthesis and Preparative Chemistry, Jilin University, Changchun, Jilin, 130012, P. R. China

b. State Key Laboratory Cultivation Base of Natural Gas Conversion, College of Chemistry and Chemical Engineering, Ningxia University, Yinchuan, 750021, P. R.

China

## **Table of contents**

### **Materials and physical measurements**

**Chart S1.** Molecular structure of H<sub>6</sub>L.

**Chart S2.** Molecular structure of five dyes.

**Table S1.** Crystallographic parameters of MOF-1.

**Table S2.** Selected bond lengths [Å] and angles [°] for MOF-1.

**Table S3.** A comparison of adsorption capacity of MB<sup>+</sup> for various materials.

**Table S4.** Kinetic Parameters for MB<sup>+</sup> adsorption for various materials.

**Figure S1.** Coordination environment around Cd1 (a) and Cd2 (b) (a: 1 - x, 1-y, 1-z;  
b: 1 - x, 2 - y, 1 - z; c: x + 1, y, z; d: x - 1, y, z; e: -x, 2 - y, 1 - z).

**Figure S2.** Powder XRD patterns of MOF-1' in different solvents (a) and in deionised water at pH = 3-11 (b).

**Figure S3.** TG curve of MOF-1.

**Figure S4.** IR spectra of MOF-1.

**Figure S5.** Desorption amount of MB<sup>+</sup> vs. sonicating number plots for MOF-1'-1.

**Figure S6.** Temporal evolution of UV-vis spectra absorption of MOF-1'-1 loaded with 1 mg MB<sup>+</sup> in 40 ml saturated NaCl acetonitrile (a); Temporal evolution of UV-vis spectra absorption of MOF-1'-1 loaded with 1 mg MB<sup>+</sup> in 40 ml pure acetonitrile solution (b).

**Figure S7.** Powder XRD patterns of MOF-1' (a), MOF-1' after one cycles of MB<sup>+</sup> desorption (b) and MOF-1' after five cycles of MB<sup>+</sup> desorption (c).

**Equation S1.**

**Equation S2.**

## Materials and physical measurements

All chemicals were of reagent grade quality and obtained from commercial sources without further purification. Cadmium chloride ( $\text{CdCl}_2 \cdot 1.5\text{H}_2\text{O}$ ), N,N-dimethylacetamide ( $\text{C}_4\text{H}_9\text{NO}$ , DMA,  $\geq 99\%$ ), nitric acid ( $\text{HNO}_3$ ,  $\geq 98\%$ ) were obtained from Aladdin Chemistry Co., Ltd. Methylene blue, Rhodamine B, Azure A chloride, Bromocresol Purple and Methyl Orange were bought from Beijing Chemical Works.  $\text{H}_6\text{L}=5,5',5''\text{-(benzene-1,3,5-triyltris(oxy))}$  triisophthalic acid was purchased from Jinan Heng Hua technology Co., Ltd. Powder X-ray diffraction (XRD) data were collected on a Rigaku/max-2550 diffractometer with  $\text{Cu-K}\alpha$  radiation ( $\lambda = 1.5418 \text{ \AA}$ ) at 298 K. Elemental analysis for C, H and N was performed on a Perkin-Elmer 2400LS II elemental analyzer. Infrared (IR) spectrum was recorded on a Perkin Elmer Spectrum 1 spectrophotometer in  $4000\text{-}450 \text{ cm}^{-1}$  region using a powdered sample on a KBr plate at 298 K. Thermogravimetric analysis (TGA) was collected on a NETZSCH STA 459F3 analyzer with a ramp rate of  $10 \text{ }^\circ\text{C}$  per minute from  $40 \text{ }^\circ\text{C}$  to  $800 \text{ }^\circ\text{C}$  under air flow. Ultraviolet-Visible (UV-Vis) spectra were measured on a Shimadzu UV-1601PC spectrophotometer at room temperature.

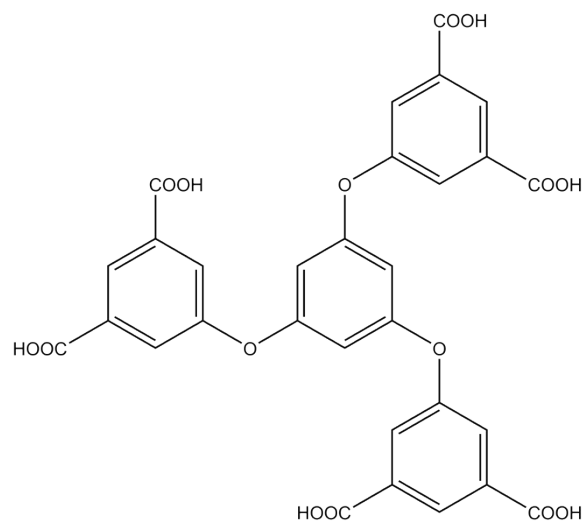

**Chart S1.** Molecular structure of H<sub>6</sub>L.

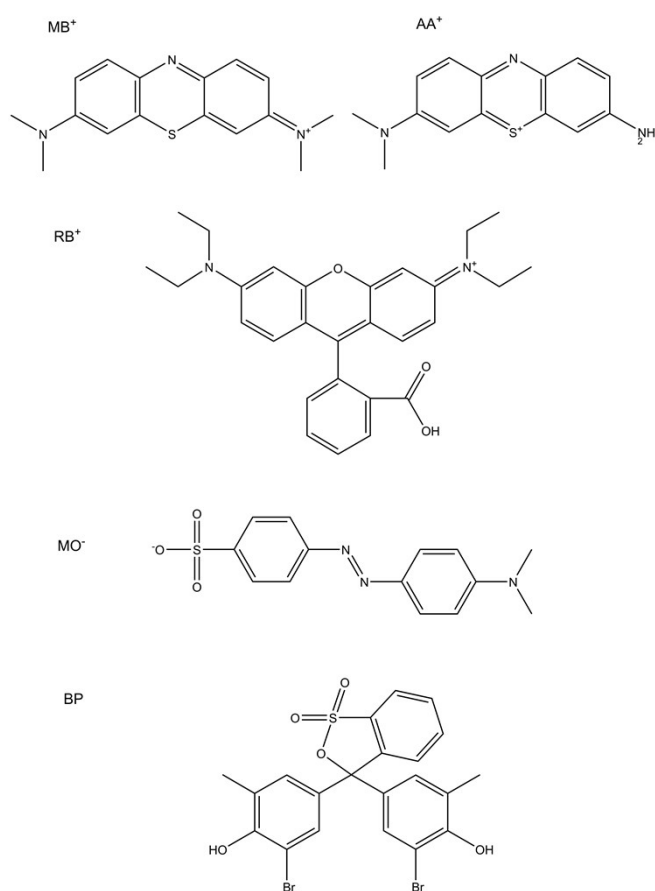

**Chart S2.** Molecular structure of five dyes.

**Table S1.** Crystallographic parameters of MOF-1.

|                               |                             |
|-------------------------------|-----------------------------|
| Formula                       | $C_{46}H_{59}N_5O_{20}Cd_2$ |
| $M$                           | 1226.82                     |
| $T$ (K)                       | 301(2)                      |
| Crystal system                | Triclinic                   |
| Space group                   | $P-1$                       |
| $a$ (Å)                       | 10.1258(10)                 |
| $b$ (Å)                       | 17.1023(18)                 |
| $c$ (Å)                       | 17.3953(18)                 |
| $\alpha$ (°)                  | 98.8930(3)                  |
| $\beta$ (°)                   | 105.7720(3)                 |
| $\gamma$ (°)                  | 100.3190(3)                 |
| $V$ (Å <sup>3</sup> )         | 2785.6000(5)                |
| $Z$                           | 2                           |
| $D_c$ (g · cm <sup>-3</sup> ) | 0.998                       |
| $\mu$ (mm <sup>-1</sup> )     | 0.804                       |
| Reflections collected         | 33660                       |
| Unique reflections            | 9792                        |
| $R_{int}$                     | 0.1024                      |
| Gof                           | 1.119                       |
| $R_1, I > 2\sigma(I)$         | 0.0967                      |
| $wR_2, \text{all data}$       | 0.3165                      |

**Table S2.** Selected bond lengths [Å] and angles [°] for MOF-1.

|              |          |                    |          |
|--------------|----------|--------------------|----------|
| Cd(1)-O(1)   | 2.231(7) | O(1)-Cd(1)-O(7)#1  | 139.2(3) |
| Cd(1)-O(7)#1 | 2.244(8) | O(1)-Cd(1)-O(12)#2 | 95.6(3)  |

|               |           |                      |          |
|---------------|-----------|----------------------|----------|
| Cd(1)-O(12)#2 | 2.293(7)  | O(7)#1-Cd(1)-O(12)#2 | 101.6(3) |
| Cd(1)-O(4)#3  | 2.356(8)  | O(1)-Cd(1)-O(4)#3    | 84.2(3)  |
| Cd(1)-O(8)#1  | 2.471(8)  | O(7)#1-Cd(1)-O(4)#3  | 123.7(3) |
| Cd(1)-O(3)#3  | 2.531(7)  | O(12)#2-Cd(1)-O(4)#3 | 108.1(3) |
| Cd(1)-O(2)    | 2.584(7)  | O(1)-Cd(1)-O(8)#1    | 102.7(3) |
| Cd(1)-C(16)#1 | 2.697(10) | O(7)#1-Cd(1)-O(8)#1  | 54.7(3)  |
| Cd(2)-O(11)#4 | 2.191(8)  | O(12)#2-Cd(1)-O(8)#1 | 156.2(3) |
| Cd(2)-O(5)#5  | 2.280(8)  | O(4)#3-Cd(1)-O(8)#1  | 89.0(3)  |
| Cd(2)-O(3)    | 2.289(8)  | O(1)-Cd(1)-O(3)#3    | 131.2(3) |
| Cd(2)-O(10)#2 | 2.320(8)  | O(7)#1-Cd(1)-O(3)#3  | 88.4(3)  |
| Cd(2)-O(9)#2  | 2.388(9)  | O(12)#2-Cd(1)-O(3)#3 | 79.7(3)  |
| Cd(2)-O(6)#5  | 2.436(9)  | O(4)#3-Cd(1)-O(3)#3  | 52.9(2)  |
| Cd(2)-C(23)#2 | 2.685(12) | O(8)#1-Cd(1)-O(3)#3  | 98.9(3)  |
| Cd(2)-C(15)#5 | 2.695(11) | O(1)-Cd(1)-O(2)      | 53.3(3)  |
| O(3)-Cd(1)#6  | 2.531(7)  | O(7)#1-Cd(1)-O(2)    | 91.2(3)  |
| O(4)-Cd(1)#6  | 2.356(8)  | O(12)#2-Cd(1)-O(2)   | 85.8(3)  |
| O(5)-Cd(2)#7  | 2.280(8)  | O(4)#3-Cd(1)-O(2)    | 136.8(3) |
| O(6)-Cd(2)#7  | 2.436(9)  | O(8)#1-Cd(1)-O(2)    | 93.0(3)  |
| O(7)-Cd(1)#1  | 2.244(8)  | O(3)#3-Cd(1)-O(2)    | 165.1(3) |
| O(8)-Cd(1)#1  | 2.471(8)  | O(2)-Cd(1)-C(16)#1   | 92.9(3)  |
| O(9)-Cd(2)#2  | 2.388(9)  | O(3)-Cd(2)-O(10)#2   | 95.6(3)  |
| O(10)-Cd(2)#2 | 2.320(7)  | O(11)#4-Cd(2)-O(9)#2 | 84.8(3)  |
| O(11)-Cd(2)#4 | 2.191(8)  | O(3)-Cd(2)-O(9)#2    | 108.3(3) |
| O(12)-Cd(1)#2 | 2.293(7)  | O(10)#2-Cd(2)-O(9)#2 | 55.0(3)  |

---

Symmetry transformations used to generate equivalent atoms: #1:  $-x+1, -y+1, -z+1$ ;  
#2:  $-x+1, -y+2, -z+1$ ; #3:  $x+1, y, z$ ; #4:  $-x, -y+2, -z+1$ .

**Table S3.** A comparison of adsorption capacity of MB<sup>+</sup> for various materials.

| Adsorbents                                                                                 | Adsorption capacity (mg·g <sup>-1</sup> ) | Reference |
|--------------------------------------------------------------------------------------------|-------------------------------------------|-----------|
| MFC@NH <sub>2</sub> -UiO-66                                                                | 49.16                                     | 45        |
| NH <sub>2</sub> -UiO-66                                                                    | 63.70                                     | 45        |
| T-CMP                                                                                      | 128.32                                    | 46        |
| Mn@RS                                                                                      | 128.5                                     | 47        |
| MoS <sub>2</sub> nanosheets                                                                | 146.43                                    | 48        |
| P-(EA-β-CD/KHA/AC) hydrogel                                                                | 262.31                                    | 49        |
| MC-Mn@RS                                                                                   | 325.8                                     | 47        |
| Fe <sub>3</sub> O <sub>4</sub> @MIL-100(Fe)                                                | 487.8                                     | 50        |
| H <sub>3</sub> PW <sub>12</sub> O <sub>40</sub> @ZIF-8                                     | 810                                       | 51        |
| ([(CH <sub>3</sub> ) <sub>2</sub> NH <sub>2</sub> ][Cd(L)DMA A]·0.5DMA·1.5H <sub>2</sub> O | 900                                       | 38        |
| MOF-1                                                                                      | 1220                                      | This work |

H<sub>3</sub>L= 4,4',4''-s-triazine-2,4,6-tribenzoic acid

**Table S4.** Kinetic Parameters for MB<sup>+</sup> adsorption for various materials

| Adsorbents                                  | Adsorption capacity (mg·g <sup>-1</sup> ) |                                                       |                | Temperature/K | Reference |
|---------------------------------------------|-------------------------------------------|-------------------------------------------------------|----------------|---------------|-----------|
|                                             | C <sub>0</sub> /mg·L <sup>-1</sup>        | k <sub>2</sub> /g·mg <sup>-1</sup> ·min <sup>-1</sup> | R <sup>2</sup> |               |           |
| MIL-100(Fe)                                 | 400                                       | 0.936 × 10 <sup>-5</sup>                              | 0.995          | 303           | 52        |
| MIL-100(Cr)                                 | 400                                       | 1.713 × 10 <sup>-4</sup>                              | 0.997          | 303           | 52        |
| Fe <sub>3</sub> O <sub>4</sub> @MIL-100(Fe) | 10                                        | 4 × 10 <sup>-4</sup>                                  | 0.9995         | 310           | 50        |
| P-(EA-β-CD/KHA/AC) hydrogel                 | 200                                       | 1.2437 × 10 <sup>-3</sup>                             | 0.99992        | 298           | 49        |



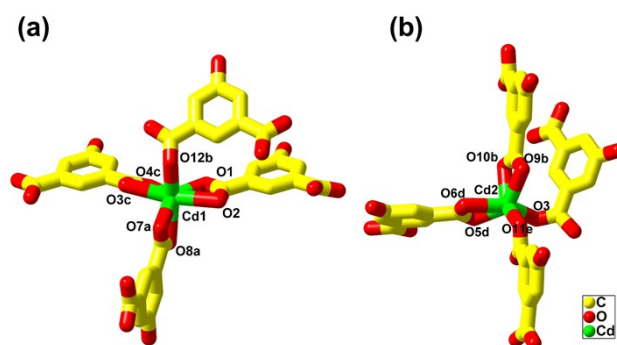

**Figure S1.** Coordination environment around Cd1 (a) and Cd2 (b) (a:  $1 - x, 1 - y, 1 - z$ ; b:  $1 - x, 2 - y, 1 - z$ ; c:  $x + 1, y, z$ ; d:  $x - 1, y, z$ ; e:  $-x, 2 - y, 1 - z$ ).

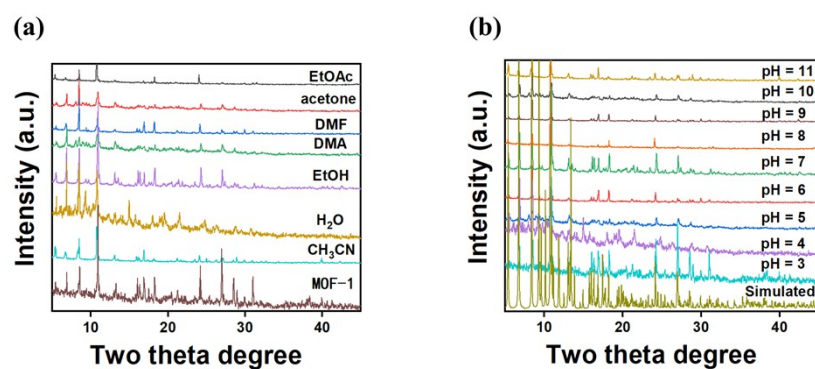

**Figure S2.** Powder XRD patterns of MOF-1' in different solvents (a) and in deionised water at pH = 3-11 (b).

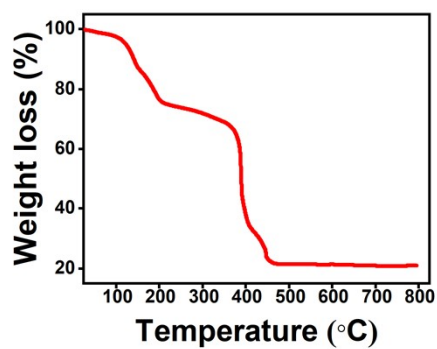

Figure S3. TG curve of MOF-1.

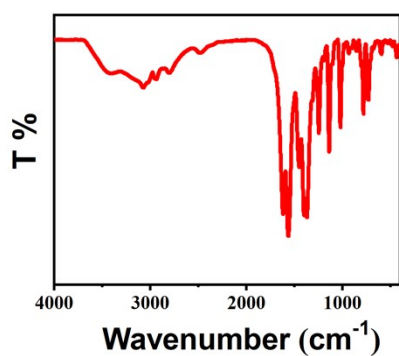

Figure S4. IR spectra of MOF-1.

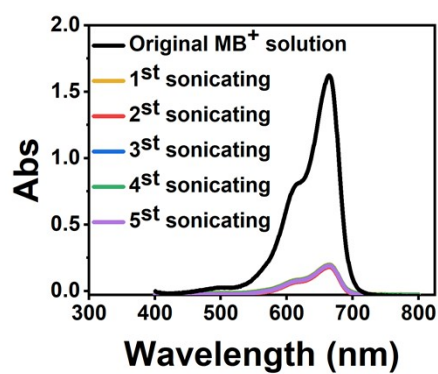

Figure S5. Desorption amount of MB<sup>+</sup> vs. sonicating number plots for MOF-1'-1.

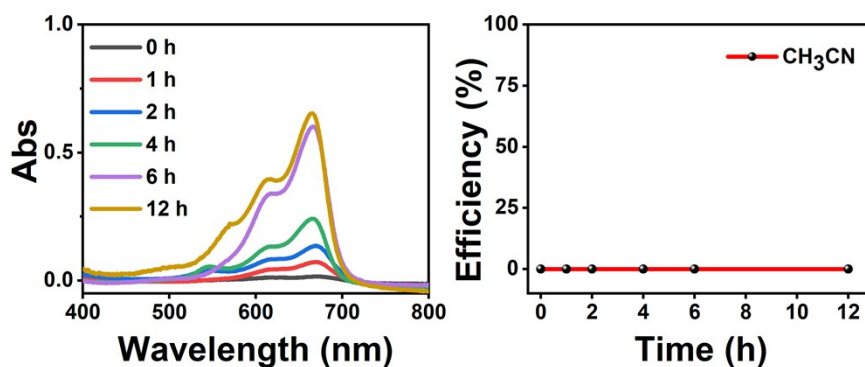

**Figure S6.** Temporal evolution of UV-vis spectra absorption of MOF-1'-1 loaded with 1 mg MB<sup>+</sup> in 40 ml saturated NaCl acetonitrile (a); Temporal evolution of UV-vis spectra absorption of MOF-1'-1 loaded with 1 mg MB<sup>+</sup> in 40 ml pure acetonitrile solution (b).

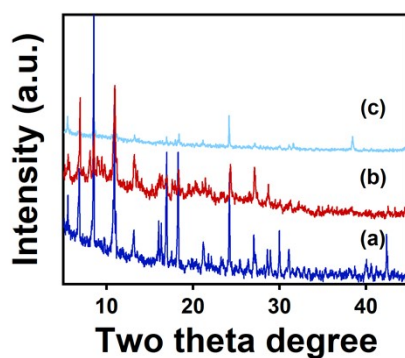

**Figure S7.** Powder XRD patterns of MOF-1' (a), MOF-1' after one cycles of MB<sup>+</sup> desorption (b) and MOF-1' after five cycles of MB<sup>+</sup> desorption (c).

**Equation S1.**

$$qe = \frac{V(c_0 - c_e)}{m}$$

\* MERGEFORMAT (S1)

In which  $q_e$ : equilibrium removal capacity ( $\text{mg}\cdot\text{g}^{-1}$ ),  $C_0$ : initial concentration of dye solution ( $\text{mg}\cdot\text{L}^{-1}$ ),  $C_e$ : equilibrium concentration of dye solution ( $\text{mg}\cdot\text{L}^{-1}$ ),  $V$ : solution volume (L), and  $m$ : adsorbate mass (g).

**Equation S2.**

$$\frac{t}{q} = \frac{1}{k_2 q_e^2} + \frac{1}{q_e} t \quad \backslash^* \text{MERGEFORMAT (S2)}$$

where  $q_t$  represents adsorbed amount at moment  $t$  ( $\text{mg}\cdot\text{g}^{-1}$ ),  $q_e$  is adsorbed amount at equilibrium moment ( $\text{mg}\cdot\text{g}^{-1}$ ),  $t$  is adsorption time (min), and  $k_2$  is adsorption rate constant ( $\text{g}\cdot\text{mg}^{-1}\cdot\text{min}^{-1}$ ).
